# Supplementary material for: Epithelial and non-epithelial Ptch1 play opposing roles to regulate proliferation and morphogenesis of the mouse mammary gland
Source: Oxford University Press journal article supplement (doi:10.1242/dev.140434), 2017-03-09
Supplement: dev140434supp.pdf [file dev140434supp.pdf]

## Supplemental Data

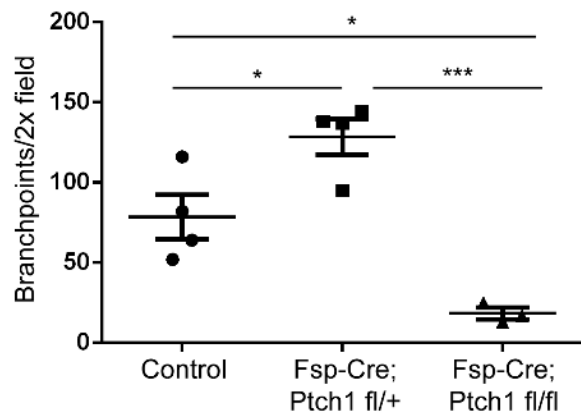

**Fig. S1. Quantification demonstrating increased branching in *Fsp-Cre;Ptch1<sup>fl/+</sup>* mutants, but reduced branching in *Fsp-Cre;Ptch1<sup>fl/fl</sup>* mutants.**

Graph shows mean  $\pm$  SEM. \* indicates  $p < 0.05$ , and \*\*\* indicates  $p < 0.001$  by ANOVA/Tukey's test. Branch points were quantified with a representative 2x field for each gland. Cont

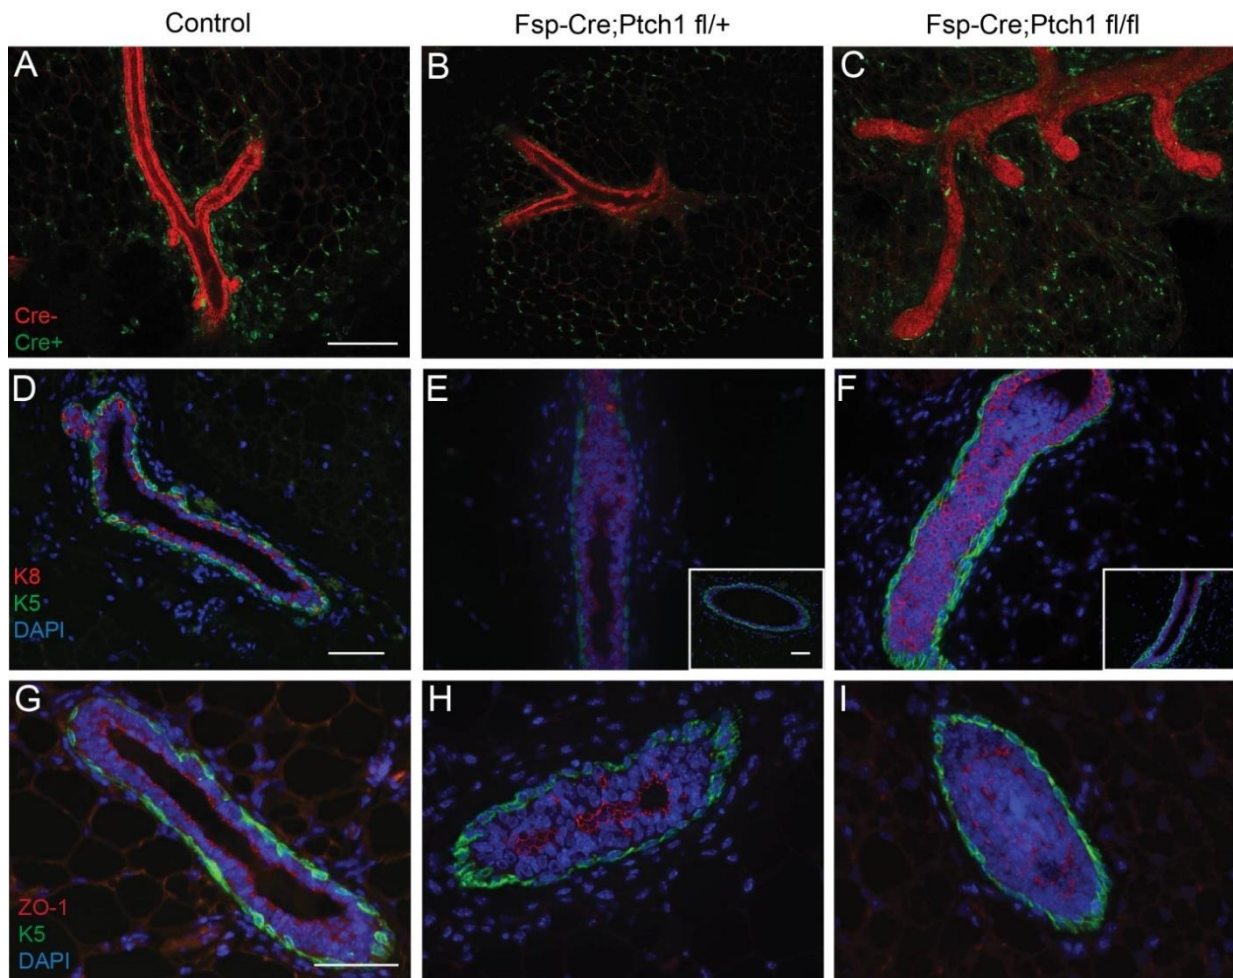

**Figure S2. *Fsp-Cre*-mediated ablation of *Ptch1* produces ducts filled with K8+ luminal cells, and aberrant microlumens.**

A-C: 3D confocal reconstruction of A) *Fsp-Cre, mTmG* B) *Fsp-Cre;Ptch1<sup>fl/+</sup>* and C) *Fsp-Cre;Ptch1<sup>fl/fl</sup>* ducts. *Cre* negative cells express TdTomato Red, and *Cre* positive cells express GFP. There are increased luminal cells inside the ducts of heterozygotes, while the homozygote displays completely filled-in ducts. Scale bar is 100  $\mu$ m.

D-E: K5 (basal), and K8 (luminal) coimmunofluorescence of D) control E) *Fsp-Cre;Ptch1<sup>fl/+</sup>* and F) *Fsp-Cre;Ptch1<sup>fl/fl</sup>* ducts, indicating that the cells filling the ducts of mutants are K8 positive. Insets display ducts with normal histology. Scale bar is 50  $\mu$ m.

G-I: ZO-1 (apical and tight junction marker) and K5 costained G) control H) *Fsp-Cre;Ptch1<sup>fl/+</sup>* and I) *Fsp-Cre;Ptch1<sup>fl/fl</sup>* ducts. The heterozygote displays extra staining in microlumens, while the homozygous mutant displays aberrant concentric staining.

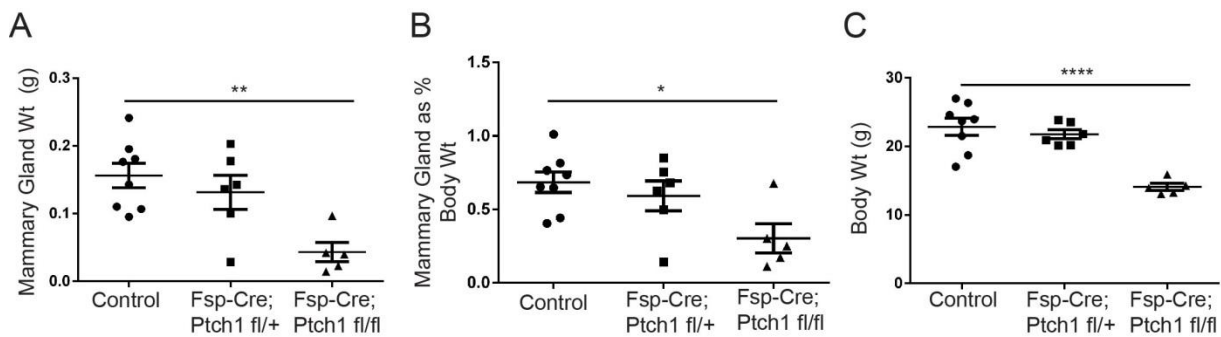

**Figure S3. *Fsp-Cre* mediated loss of *Ptch1* reduces mammary gland and body weight.**

- A) Mass of inguinal mammary gland of control and mutant animals at 8 weeks, showing a decrease in *Fsp-Cre;Ptch1<sup>fl/fl</sup>* mutants.
- B) Mass of control and mutant animals at 8 weeks as percent body weight, showing a decrease in *Fsp-Cre;Ptch1<sup>fl/fl</sup>* mutants.
- C) Body weight of control and mutant animals at 8 weeks, showing a decrease in *Fsp-Cre;Ptch1<sup>fl/fl</sup>* mutants.

Graphs show data as mean  $\pm$  SEM, and weights are given in grams. \* indicates  $p < 0.05$ , \*\* indicates  $p < 0.01$ , and \*\*\*\* indicates  $p < 0.0001$  by ANOVA/Tukey's test.

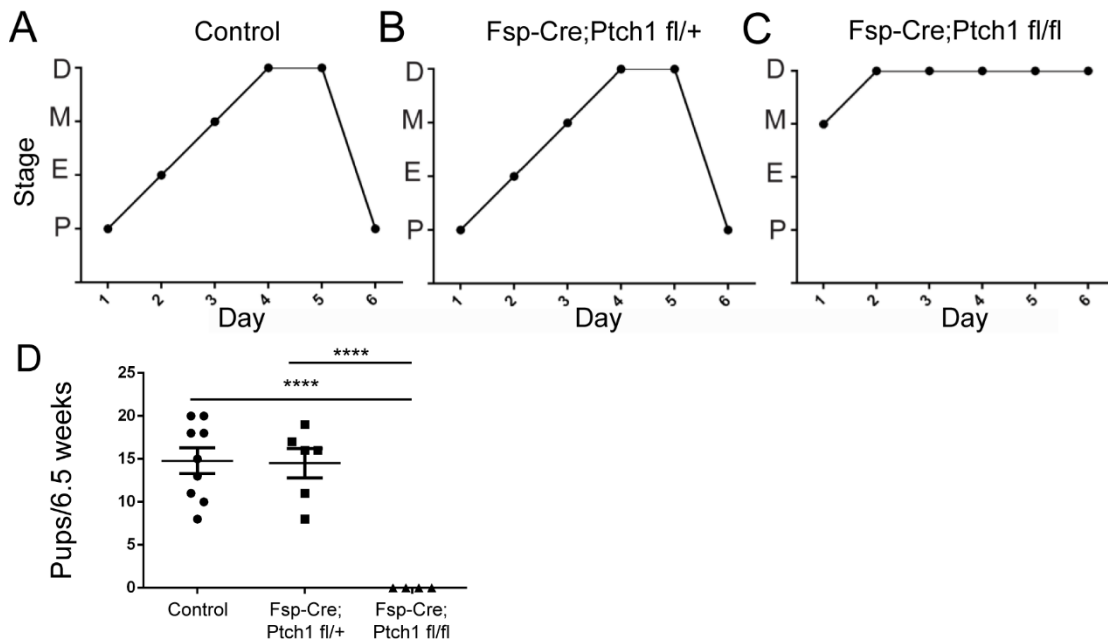

**Figure S4. *Fsp-Cre;Ptch1<sup>fl/fl</sup>* animals do not proceed through the estrous cycle normally, and have severely compromised fertility.**

A-C: representative estrous cycle for A) control B) *Fsp-Cre;Ptch1<sup>fl/+</sup>* and C) *Fsp-Cre;Ptch1<sup>fl/fl</sup>* animals. Homozygous mutants do not cycle normally as assayed by vaginal smear in  $\geq 4$  animals per group. D indicates diestrous, M metestrous, E estrous, and P proestrous.

D: Number of pups produced by females of different genotypes over 6.5 weeks showing severe loss of fertility in *Fsp-Cre;Ptch1<sup>fl/fl</sup>* animals. Control animals produced  $14.8 \pm 1.5$ , heterozygotes produced  $14.5 \pm 1.7$ , and homozygotes produced no pups. \*\*\*\* denotes  $p < 0.0001$  by ANOVA/Tukey's test.

Table S1. Antibodies used for immunostaining.

| Antibody                                      | Concentration             | Antigen Retrieval                |
|-----------------------------------------------|---------------------------|----------------------------------|
| Ki67 (Vector Labs, Rabbit Polyclonal VP K451) | 1:200                     | 1 mM Sodium citrate buffer, pH 6 |
| GFP (Living Colors, Clontech JL-8)            | 1:250                     | Citrate                          |
| BrdU (Abcam #6326)                            | 1:250                     | 10 mM Tris, 1 mM EDTA, pH 9.0    |
| ZO-1 (Millipore MABT11)                       | 1:100                     | Citrate                          |
| ER $\alpha$ (Santa Cruz)                      | 1:100                     | Citrate                          |
| PR (DAKO)                                     | BCM Breast Pathology Core |                                  |
| K5 (Abcam 52635)                              | 1:100                     | Citrate                          |
| K8 (U. of Iowa, Hybridoma bank)               | 1:100                     | Citrate                          |
| CC3 (Cell Signaling 9661)                     | 1:200                     | Citrate                          |
| Cyclin B1 (Cell Signaling 4138)               | 1:100                     | TE pH 9.0                        |
| Anti-Rabbit 594 (Secondary) (AlexaFluor)      | 1:500                     | either                           |
| Anti-Mouse 488 (Secondary) (AlexaFluor)       | 1:500                     | either                           |

Table S2: Primers used for QPCR

| Gene  | Primer Ref No.<br>(Taqman) | Probe                        |
|-------|----------------------------|------------------------------|
| 18S   | Mm03928990_g1              |                              |
| Ptch1 | Mm00436026_m1              | Exon 17-18 (start base 2846) |
| Ptch2 | Mm00436047_m1              | Exon 19-20 (start 3115)      |
| Smo   | Mm01162704_m1              | Exon 1-2 (start 856)         |
| Gli1  | Mm00494654_m1              | Exon 11-12 (start 1476)      |
| Gli2  | Mm01293111_m1              | Exon 13-14 (start 2598)      |
| Gli3  | Mm00492345_m1              | Exon 14-15 (start 2867)      |
| Hhip  | Mm00469580_m1              | Exon 12-13 (start 2406)      |

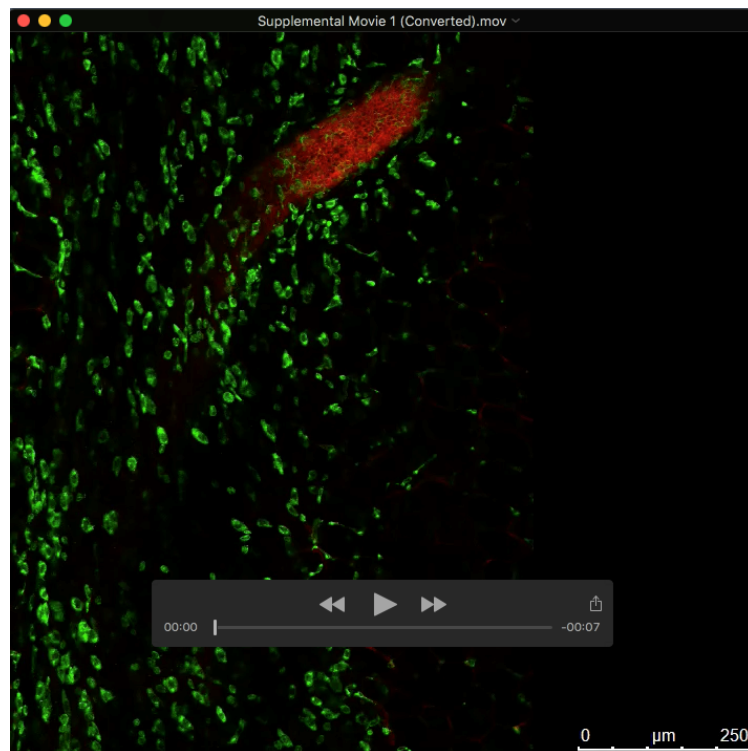

#### Supplemental Movie 1:

This movie is a confocal Z-stack from an eight-week-old *Fsp-Cre;Ptch1<sup>+/+</sup>;mTmG+* mammary duct showing a clear ductal lumen. GFP and RFP are endogenous fluorescence from the *mTmG* reporter; GFP indicates *Fsp-Cre+* stromal cells, while RFP is expressed by *Fsp-* cells.

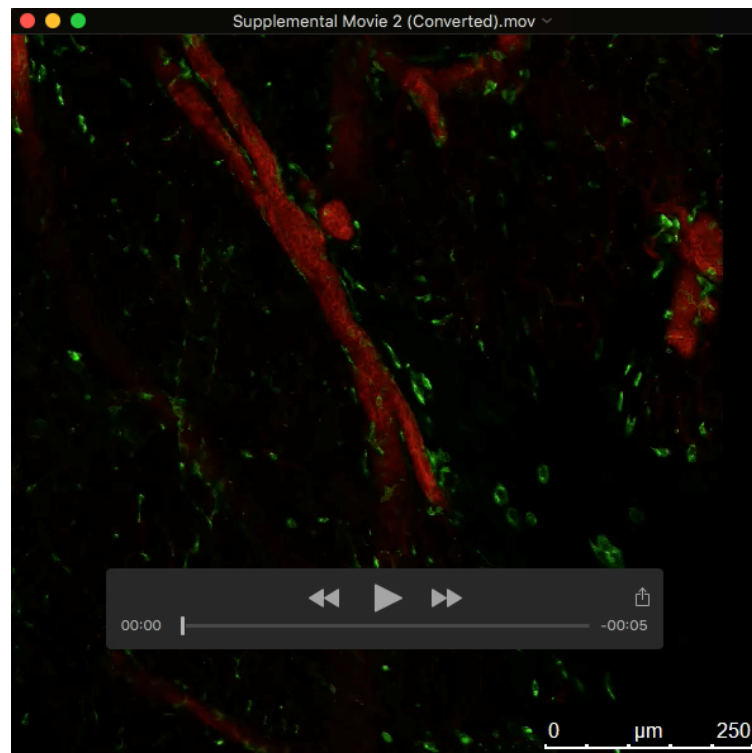

#### Supplemental Movie 2:

This movie is a confocal Z-stack of eight-week-old *Fsp-Cre*; *Ptch1<sup>fl/fl</sup>*; *mTmG*+ mammary ducts showing some ducts with clear lumens, and a duct filled with RFP+ cells (upper right). GFP and RFP are endogenous fluorescence from the *mTmG* reporter; GFP indicates *Fsp-Cre*+ cells, while RFP is expressed by non-*Fsp*+ cells.
